# Supplementary material for: Influence of the COVID-19 Outbreak in Vulnerable Patients (Pediatric Patients, Pregnant Women, and Elderly Patients) on an Emergency Medical Service System: A Pre- and Post-COVID-19 Pandemic Comparative Study Using the Population-Based ORION Registry
Source: MDPI journal article supplement (doi:10.3390/medicina60020345), 2024-02-19
Supplement: s1 [file s1]

## Article

# Influence of the COVID-19 Outbreak in Vulnerable Patients (Pediatric Patients, Pregnant Women, and Elderly Patients) on an Emergency Medical Service System: A Pre- and Post-COVID-19 Pandemic Comparative Study Using the Population-Based ORION Registry

Koshi Ota <sup>1,2,\*</sup>, Masahiko Nitta <sup>1</sup>, Tomonobu Komeya <sup>3</sup>, Tetsuya Matsuoka <sup>2</sup> and Akira Takasu <sup>1</sup>

<sup>1</sup> Department of Emergency and Critical Care Medicine, Osaka Medical and Pharmaceutical University, Takatsuki 569-8686, Japan; nittam@ompu.ac.jp (M.N.); akira.takasu@ompu.ac.jp (A.T.)

<sup>2</sup> Working Group for Analysis of the Emergency Medical Care System in Osaka Prefecture, Osaka 530-0000, Japan; t-matsuoka@rgmc.izumisano.osaka.jp

<sup>3</sup> Osaka Prefectural Government, Osaka 540-8570, Japan; komeyat@mbx.pref.osaka.lg.jp

\* Correspondence: koshi.ota@ompu.ac.jp

**Table S1.** Multivariate logistic regression analysis of difficult-to-transport cases among all patients (adult as a variable).

|                                                 | Odds Ratio | 95%CI |        | p-Value |
|-------------------------------------------------|------------|-------|--------|---------|
| Year                                            |            |       |        |         |
| 2019                                            | Reference  |       |        |         |
| 2021                                            | 1.40       | 1.38  | – 1.41 | <0.001  |
| Female (compared with male)                     | 0.94       | 0.92  | – 0.96 | <0.001  |
| Month                                           |            |       |        |         |
| June                                            | Reference  |       |        |         |
| January                                         | 1.93       | 1.83  | – 2.03 | <0.001  |
| February                                        | 1.56       | 1.48  | – 1.65 | <0.001  |
| March                                           | 1.27       | 1.20  | – 1.35 | <0.001  |
| April                                           | 1.66       | 1.57  | – 1.75 | <0.001  |
| May                                             | 1.60       | 1.51  | – 1.69 | <0.001  |
| July                                            | 1.01       | 0.95  | – 1.07 | 0.866   |
| August                                          | 1.29       | 1.22  | – 1.37 | <0.001  |
| September                                       | 1.29       | 1.22  | – 1.37 | <0.001  |
| October                                         | 1.02       | 0.96  | – 1.09 | 0.457   |
| November                                        | 1.03       | 0.97  | – 1.10 | 0.329   |
| December                                        | 1.09       | 1.02  | – 1.15 | 0.006   |
| Weekends (compared with weekdays)               | 1.18       | 1.16  | – 1.21 | <0.001  |
| Nighttime (17:00–09:00) (compared with daytime) | 2.47       | 2.41  | – 2.53 | <0.001  |
| Adult (age >15 y and <65 y)                     | 1.22       | 1.20  | – 1.25 | <0.001  |
| COVID-19 (including suspected cases)            | 1.41       | 1.33  | – 1.50 | <0.001  |

**Table S2.** Multivariate logistic regression analysis of difficult-to-transport cases among all patients in 2019 and 2021 (pediatric patients, pregnant women, elderly patients, and vulnerable population as a variable).

## Pediatric patients as a variable

2019

|  | Odds ratio | 95%CI | P-value |
|--|------------|-------|---------|
|--|------------|-------|---------|

|                                                 |           |      |   |      |        |
|-------------------------------------------------|-----------|------|---|------|--------|
| Female (compared with male)                     | 0.88      | 0.85 | – | 0.91 | <0.001 |
| Month                                           |           |      |   |      |        |
| June                                            | Reference |      |   |      |        |
| January                                         | 2.03      | 1.87 | – | 2.20 | <0.001 |
| February                                        | 1.65      | 1.51 | – | 1.80 | <0.001 |
| March                                           | 1.38      | 1.26 | – | 1.51 | <0.001 |
| April                                           | 1.26      | 1.15 | – | 1.38 | <0.001 |
| May                                             | 1.17      | 1.06 | – | 1.28 | 0.001  |
| July                                            | 0.95      | 0.86 | – | 1.04 | 0.25   |
| August                                          | 1.06      | 0.97 | – | 1.16 | 0.196  |
| September                                       | 0.94      | 0.85 | – | 1.04 | 0.219  |
| October                                         | 0.98      | 0.89 | – | 1.08 | 0.629  |
| November                                        | 1.02      | 0.93 | – | 1.12 | 0.711  |
| December                                        | 1.11      | 1.01 | – | 1.21 | 0.03   |
| Weekends (compared with weekdays)               | 1.24      | 1.19 | – | 1.29 | <0.001 |
| Nighttime (17:00–09:00) (compared with daytime) | 2.95      | 2.83 | – | 3.08 | <0.001 |
| Children (compared with adult >15 y)            | 0.37      | 0.34 | – | 0.41 | <0.001 |
| COVID-19 (including suspected cases)            | (omitted) |      |   |      |        |
| 2021                                            |           |      |   |      |        |
| Female (compared with male)                     | 0.93      | 0.90 | – | 0.96 | <0.001 |
| Month                                           |           |      |   |      |        |
| June                                            | Reference |      |   |      |        |
| January                                         | 1.75      | 1.63 | – | 1.88 | <0.001 |
| February                                        | 1.44      | 1.33 | – | 1.55 | <0.001 |
| March                                           | 1.16      | 1.08 | – | 1.25 | <0.001 |
| April                                           | 1.92      | 1.79 | – | 2.07 | <0.001 |
| May                                             | 1.91      | 1.78 | – | 2.06 | <0.001 |
| July                                            | 1.04      | 0.96 | – | 1.12 | 0.319  |
| August                                          | 1.44      | 1.34 | – | 1.55 | <0.001 |
| September                                       | 1.50      | 1.40 | – | 1.62 | <0.001 |
| October                                         | 1.03      | 0.96 | – | 1.12 | 0.411  |
| November                                        | 1.01      | 0.93 | – | 1.09 | 0.873  |
| December                                        | 1.04      | 0.96 | – | 1.12 | 0.332  |
| Weekends (compared with weekdays)               | 1.16      | 1.12 | – | 1.19 | <0.001 |
| Nighttime (17:00–09:00) (compared with daytime) | 2.35      | 2.28 | – | 2.42 | <0.001 |
| Pediatric patients (compared with adult >15 y)  | 0.29      | 0.27 | – | 0.32 | <0.001 |
| COVID-19 (including suspected cases)            | 1.30      | 1.22 | – | 1.38 | <0.001 |
| Pregnant women as a variable                    |           |      |   |      |        |
| 2019                                            |           |      |   |      |        |
| Female (compared with male)                     | 0.90      | 0.87 | – | 0.93 | <0.001 |
| Month                                           |           |      |   |      |        |
| June                                            | Reference |      |   |      |        |
| January                                         | 2.03      | 1.87 | – | 2.20 | <0.001 |
| February                                        | 1.66      | 1.52 | – | 1.82 | <0.001 |
| March                                           | 1.39      | 1.27 | – | 1.52 | <0.001 |
| April                                           | 1.27      | 1.16 | – | 1.39 | <0.001 |
| May                                             | 1.17      | 1.07 | – | 1.28 | 0.001  |
| July                                            | 0.95      | 0.86 | – | 1.05 | 0.306  |
| August                                          | 1.08      | 0.99 | – | 1.18 | 0.1    |

|                                                 |           |      |   |      |        |
|-------------------------------------------------|-----------|------|---|------|--------|
| September                                       | 0.95      | 0.87 | – | 1.05 | 0.34   |
| October                                         | 0.99      | 0.90 | – | 1.09 | 0.863  |
| November                                        | 1.04      | 0.94 | – | 1.14 | 0.47   |
| December                                        | 1.12      | 1.02 | – | 1.22 | 0.018  |
| Weekends (compared with weekdays)               | 1.23      | 1.19 | – | 1.28 | <0.001 |
| Nighttime (17:00–09:00) (compared with daytime) | 2.93      | 2.82 | – | 3.06 | <0.001 |
| Pregnant women                                  | 0.44      | 0.25 | – | 0.77 | 0.004  |
| COVID-19 (including suspected cases)            | (omitted) |      |   |      |        |
| 2021                                            |           |      |   |      |        |
| Female (compared with male)                     | 0.95      | 0.92 | – | 0.98 | <0.001 |
| Month                                           |           |      |   |      |        |
| June                                            | Reference |      |   |      |        |
| January                                         | 1.81      | 1.68 | – | 1.94 | <0.001 |
| February                                        | 1.48      | 1.37 | – | 1.59 | <0.001 |
| March                                           | 1.19      | 1.10 | – | 1.28 | <0.001 |
| April                                           | 1.94      | 1.80 | – | 2.08 | <0.001 |
| May                                             | 1.92      | 1.79 | – | 2.07 | <0.001 |
| July                                            | 1.05      | 0.98 | – | 1.14 | 0.172  |
| August                                          | 1.47      | 1.37 | – | 1.58 | <0.001 |
| September                                       | 1.54      | 1.43 | – | 1.66 | <0.001 |
| October                                         | 1.05      | 0.97 | – | 1.14 | 0.189  |
| November                                        | 1.03      | 0.95 | – | 1.11 | 0.498  |
| December                                        | 1.06      | 0.98 | – | 1.15 | 0.116  |
| Weekends (compared with weekdays)               | 1.15      | 1.12 | – | 1.18 | <0.001 |
| Nighttime (17:00–09:00) (compared with daytime) | 2.32      | 2.26 | – | 2.40 | <0.001 |
| Pregnant women                                  | 0.52      | 0.33 | – | 0.81 | 0.004  |
| COVID-19 (including suspected cases)            | 1.36      | 1.28 | – | 1.45 | <0.001 |
| Elderly patients as a variable                  |           |      |   |      |        |
| 2019                                            |           |      |   |      |        |
| Female (compared with male)                     | 0.91      | 0.87 | – | 0.94 | <0.001 |
| Month                                           |           |      |   |      |        |
| June                                            | Reference |      |   |      |        |
| January                                         | 2.04      | 1.88 | – | 2.22 | <0.001 |
| February                                        | 1.67      | 1.53 | – | 1.83 | <0.001 |
| March                                           | 1.40      | 1.28 | – | 1.53 | <0.001 |
| April                                           | 1.27      | 1.16 | – | 1.39 | <0.001 |
| May                                             | 1.17      | 1.07 | – | 1.29 | 0.001  |
| July                                            | 0.95      | 0.86 | – | 1.05 | 0.299  |
| August                                          | 1.08      | 0.99 | – | 1.18 | 0.095  |
| September                                       | 0.96      | 0.87 | – | 1.05 | 0.357  |
| October                                         | 0.99      | 0.90 | – | 1.10 | 0.915  |
| November                                        | 1.04      | 0.95 | – | 1.15 | 0.399  |
| December                                        | 1.12      | 1.02 | – | 1.23 | 0.015  |
| Weekends (compared with weekdays)               | 1.23      | 1.18 | – | 1.28 | <0.001 |
| Nighttime (17:00–09:00) (compared with daytime) | 2.89      | 2.77 | – | 3.01 | <0.001 |
| Old (compared with young <65 y)                 | 0.87      | 0.84 | – | 0.90 | <0.001 |
| COVID-19 (including suspected cases)            | (omitted) |      |   |      |        |
| 2021                                            |           |      |   |      |        |
| Female (compared with male)                     | 0.94      | 0.91 | – | 0.97 | <0.001 |

| Month                                              |                   |              |   |      |                |
|----------------------------------------------------|-------------------|--------------|---|------|----------------|
| June                                               | Reference         |              |   |      |                |
| January                                            | 1.79              | 1.67         | – | 1.92 | <0.001         |
| February                                           | 1.47              | 1.36         | – | 1.58 | <0.001         |
| March                                              | 1.18              | 1.10         | – | 1.28 | <0.001         |
| April                                              | 1.93              | 1.80         | – | 2.08 | <0.001         |
| May                                                | 1.92              | 1.79         | – | 2.06 | <0.001         |
| July                                               | 1.06              | 0.98         | – | 1.14 | 0.165          |
| August                                             | 1.48              | 1.37         | – | 1.59 | <0.001         |
| September                                          | 1.54              | 1.43         | – | 1.66 | <0.001         |
| October                                            | 1.05              | 0.97         | – | 1.14 | 0.208          |
| November                                           | 1.02              | 0.95         | – | 1.11 | 0.556          |
| December                                           | 1.06              | 0.98         | – | 1.14 | 0.144          |
| Weekends (compared with weekdays)                  | 1.15              | 1.12         | – | 1.19 | <0.001         |
| Nighttime (17:00–09:00) (compared with daytime)    | 2.35              | 2.28         | – | 2.42 | <0.001         |
| Old (compared with young <65 y)                    | 1.11              | 1.08         | – | 1.14 | <0.001         |
| COVID-19 (including suspected cases)               | 1.37              | 1.29         | – | 1.46 | <0.001         |
| Vulnerable patients as a variable                  |                   |              |   |      |                |
| 2019                                               |                   |              |   |      |                |
|                                                    | <b>Odds ratio</b> | <b>95%CI</b> |   |      | <b>P-value</b> |
| Female (compared with male)                        | 0.91              | 0.88         | – | 0.95 | <0.001         |
| Month                                              |                   |              |   |      |                |
| June                                               | Reference         |              |   |      |                |
| January                                            | 2.07              | 1.90         | – | 2.24 | <0.001         |
| February                                           | 1.68              | 1.54         | – | 1.83 | <0.001         |
| March                                              | 1.40              | 1.28         | – | 1.53 | <0.001         |
| April                                              | 1.27              | 1.16         | – | 1.39 | <0.001         |
| May                                                | 1.17              | 1.07         | – | 1.29 | 0.001          |
| July                                               | 0.95              | 0.86         | – | 1.04 | 0.266          |
| August                                             | 1.07              | 0.98         | – | 1.18 | 0.13           |
| September                                          | 0.95              | 0.86         | – | 1.05 | 0.308          |
| October                                            | 0.99              | 0.90         | – | 1.09 | 0.877          |
| November                                           | 1.04              | 0.95         | – | 1.15 | 0.384          |
| December                                           | 1.12              | 1.02         | – | 1.23 | 0.014          |
| Weekends (compared with weekdays)                  | 1.23              | 1.18         | – | 1.28 | <0.001         |
| Nighttime (17:00–09:00) (compared with daytime)    | 2.82              | 2.70         | – | 2.93 | <0.001         |
| Vulnerable patients (compared with non-vulnerable) | 0.69              | 0.67         | – | 0.72 | <0.001         |
| COVID-19 (including suspected cases)               | (omitted)         |              |   |      |                |
| 2021                                               |                   |              |   |      |                |
| Female (compared with male)                        | 0.95              | 0.93         | – | 0.98 | <0.001         |
| Month                                              |                   |              |   |      |                |
| June                                               | Reference         |              |   |      |                |
| January                                            | 1.81              | 1.69         | – | 1.95 | <0.001         |
| February                                           | 1.48              | 1.37         | – | 1.60 | <0.001         |
| March                                              | 1.19              | 1.10         | – | 1.28 | <0.001         |
| April                                              | 1.94              | 1.81         | – | 2.08 | <0.001         |
| May                                                | 1.92              | 1.79         | – | 2.07 | <0.001         |
| July                                               | 1.05              | 0.97         | – | 1.14 | 0.196          |

|                                                    |      |      |   |      |        |
|----------------------------------------------------|------|------|---|------|--------|
| August                                             | 1.46 | 1.36 | – | 1.57 | <0.001 |
| September                                          | 1.54 | 1.43 | – | 1.65 | <0.001 |
| October                                            | 1.05 | 0.97 | – | 1.14 | 0.193  |
| November                                           | 1.03 | 0.95 | – | 1.11 | 0.489  |
| December                                           | 1.06 | 0.99 | – | 1.15 | 0.108  |
| Weekends (compared with weekdays)                  | 1.15 | 1.12 | – | 1.18 | <0.001 |
| Nighttime (17:00–09:00) (compared with daytime)    | 2.30 | 2.23 | – | 2.37 | <0.001 |
| Vulnerable patients (compared with non-vulnerable) | 0.90 | 0.88 | – | 0.93 | <0.001 |
| COVID-19 (including suspected cases)               | 1.35 | 1.27 | – | 1.44 | <0.001 |

**Table S3.** Multivariate logistic regression analysis of death in the ED for all patients (pediatric patients as a variable).

|                                                 | Odds ratio | 95% confidence interval |   |      | p-Value |
|-------------------------------------------------|------------|-------------------------|---|------|---------|
| Year                                            |            |                         |   |      |         |
| 2019                                            | Reference  |                         |   |      |         |
| 2021                                            | 1.17       | 1.15                    | – | 1.20 | <0.001  |
| Female (compared with male)                     | 0.80       | 0.77                    | – | 0.83 | <0.001  |
| Season                                          |            |                         |   |      |         |
| Spring                                          | Reference  |                         |   |      |         |
| Summer                                          | 0.73       | 0.69                    | – | 0.78 | <0.001  |
| Autumn                                          | 0.84       | 0.80                    | – | 0.89 | <0.001  |
| Winter                                          | 1.19       | 1.13                    | – | 1.25 | <0.001  |
| Weekends (compared with weekdays)               | 0.97       | 0.93                    | – | 1.01 | 0.18    |
| Nighttime (17:00–09:00) (compared with daytime) | 1.41       | 1.35                    | – | 1.46 | <0.001  |
| Children (compared with adult >15y)             | 0.08       | 0.06                    | – | 0.10 | <0.001  |
| Covid-19 (including suspected cases)            | 0.23       | 0.18                    | – | 0.30 | <0.001  |
